# Supplementary material for: Photorelease of nitric oxide from Pluronic F127/chitosan hydrogels incorporating a water soluble ruthenium nitrosyl complex
Source: Royal Society of Chemistry journal article supplement (doi:10.1039/d4nj00724g), 2024-01-01
Supplement: d4nj00724g1.pdf [file d4nj00724g1.pdf]

## Electronic Supplementary Information

### Photorelease of nitric oxide from Pluronic F127/Chitosan hydrogels incorporating a water soluble ruthenium nitrosyl complex

Hazem Gzam,<sup>a</sup> Dalel Katar,<sup>a</sup> Marine Tassé,<sup>a</sup> Yue Xiao,<sup>a</sup> Isabelle Malfant,<sup>\*a</sup> Juliette Fitremann,<sup>b</sup> Patricia Vicendo,<sup>b</sup> Anne-Françoise Mingotaud,<sup>\*b</sup> Dominique de Caro,<sup>\*a</sup>

<sup>a</sup>Laboratoire de Chimie de Coordination du CNRS, 205 route de Narbonne, F-31077 Toulouse, France.

<sup>b</sup>Softmat, Université de Toulouse, CNRS UMR 5623, Université de Toulouse III - Paul Sabatier, 118 route de Narbonne, 31062 Toulouse cedex 9, France.

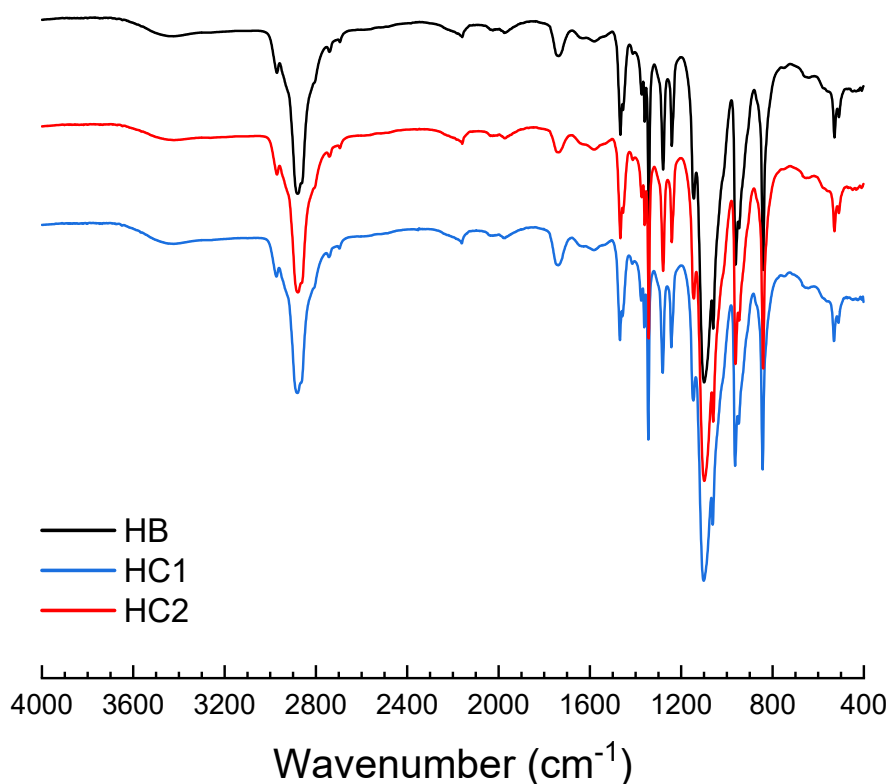

Figure SI-1: Infrared spectra for hydrogels

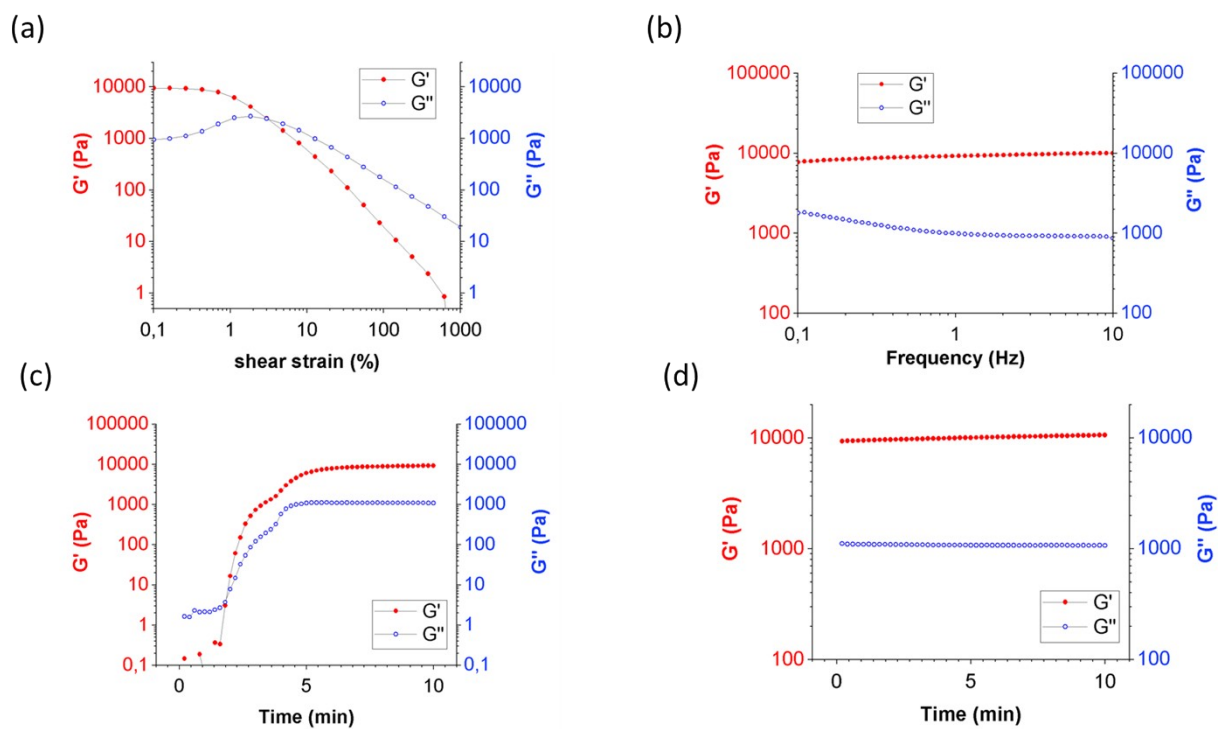

Figure SI-2. Complementary rheological data for HB. (a) Shear strain sweep for the determination of the Linear Viscoelastic Region (LVR) at 37 °C. (b) Frequency sweep at 37 °C showing that HB is a gel. (c) Evolution of  $G'$  and  $G''$  after an instantaneous switch from 20 °C to 37 °C; it gives the time of gelation. (d) Evolution of the moduli  $G'$  and  $G''$  at 37 °C when the gel is irradiated for 10 min at 415 nm, 20 mW.cm<sup>-2</sup>

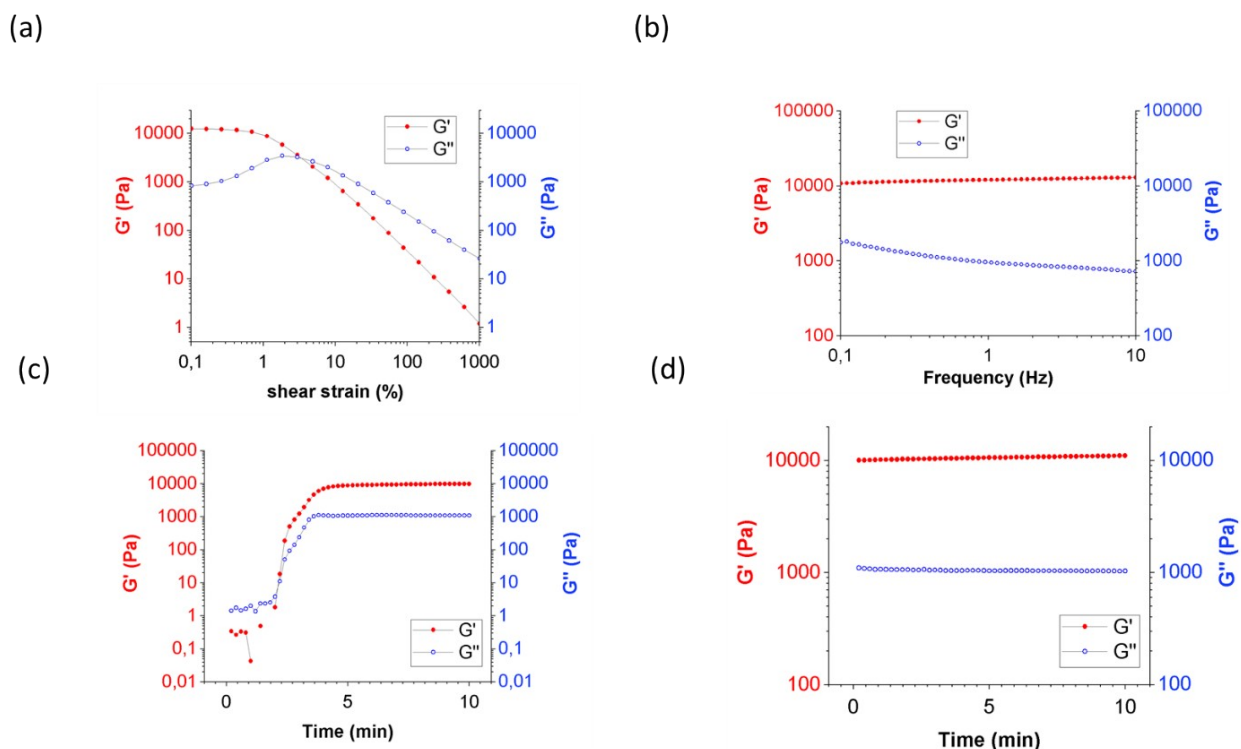

Figure SI-3. Complementary rheological data for HC1. (a) Shear strain sweep for the determination of the Linear Viscoelastic Region (LVR) at 37 °C. (b) Frequency sweep at 37 °C showing that HC1 is a gel. (c) Evolution of  $G'$  and  $G''$  after an instantaneous switch from 20 °C to 37 °C; it gives the time of gelation. (d) Evolution of the moduli  $G'$  and  $G''$  at 37 °C when the gel is irradiated for 10 min at 415 nm, 20 mW.cm<sup>-2</sup>

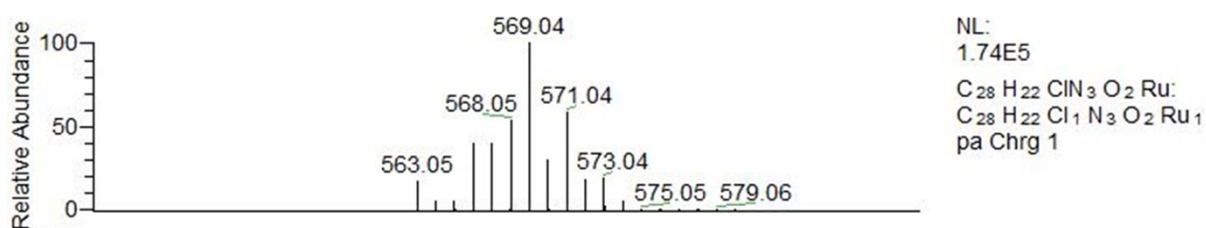

Figure SI-4. Mass spectrum for  $[\text{Ru}^{\text{III}}(\text{FT})\text{Cl}(\text{H}_2\text{O})(\text{OH})]^+$

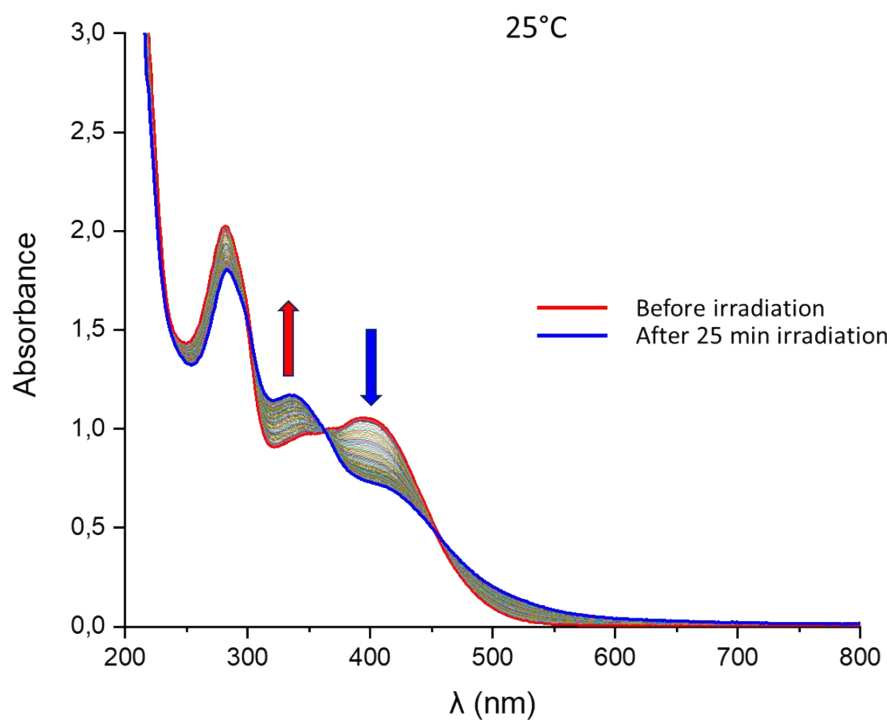

Figure SI-5. Evolution in the absorbance spectra for the *trans*-(NO,OH)-[Ru(FT)Cl(NO)(OH)]<sup>+</sup> cation in water under irradiation at 400 nm

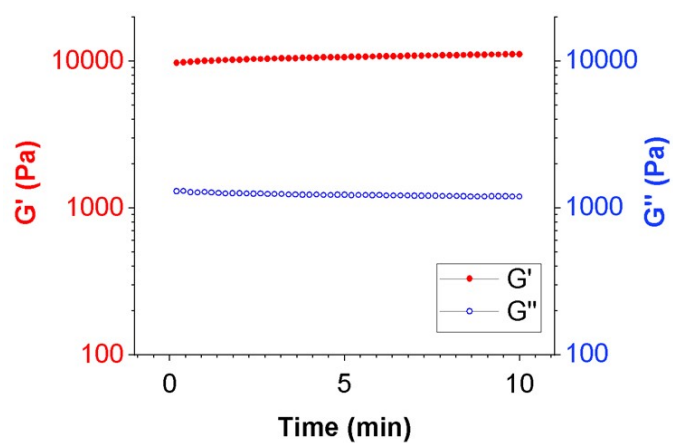

Figure SI-6. Evolution of the moduli  $G'$  and  $G''$  for HC2 at 37 °C when the gel is irradiated for 10 min. at 415 nm ( $20 \text{ mW}\cdot\text{cm}^{-2}$ )
